# Supplementary material
Source: PubMed Central journal article supplement (PMC3063105)

## SUPPORTING INFORMATION

# Small Molecule Microarrays Enable the Discovery of Compounds that Bind the Alzheimer's A $\beta$ Peptide.

*Jermont Chen<sup>†‡</sup>, Anne H. Armstrong<sup>†</sup>, Angela N. Koehler<sup>§</sup>, and Michael H. Hecht<sup>†\*</sup>*

<sup>†</sup> Department of Chemistry, Princeton University, Princeton, NJ, 08544

<sup>§</sup> Broad Institute of Harvard and MIT, Cambridge, MA 02142

\* To whom correspondence should be addressed: [hecht@princeton.edu](mailto:hecht@princeton.edu), Phone: 609-258-2901

<sup>‡</sup> Current Address: Propulsion Directorate, Air Force Research Laboratory, Wright-Patterson AFB, OH 45433

### Complete References 11 & 59

(11) Borchelt, D. R.; Thinakaran, G.; Eckman, C. B.; Lee, M. K.; Davenport, F.; Ratovitsky, T.; Prada, C.-M.; Kim, G.; Seekins, S.; Yager, D.; Slunt, H. H.; Wang, R.; Seeger, M.; Levey, A. I.; Gandy, S. E.; Copeland, N. G.; Jenkins, N. A.; Price, D. L.; Younkin, S. G.; Sisodia, S. S. *Neuron* **1996**, *17*, 1005.

(59) Klunk, W. E.; Engler, H.; Nordberg, A.; Wang, Y.; Blomqvist, G.; Holt, D. P.; Bergstrom, M.; Savitcheva, I.; Huang, G.-F.; Estrada, S.; Ausen, B.; Debnath, M. L.; Barletta, J.; Price, J. C.; Sandell, J.; Lopresti, B. J.; Wall, A.; Koivisto, P.; Antoni, G.; Mathis, C. A.; Langstrom, B. *Ann. Neurol.* **2004**, *55*, 306.

**Table S1.** Complete toxicity rescue data for the 79 compounds identified as hits in the SMM assay for binding to the A $\beta$  peptide. 100% rescue scaled as the absorbance difference for cells not exposed to A $\beta$  or exogenous compounds ( $A_{570-670} = 0.716$ ) and 0% rescue as that of cells exposed to A $\beta$ 42 alone ( $A_{570-670} = 0.496$ ). Composite Z-scores are also shown. Compound 2002-H20 is highlighted in grey.

| Well Position | Broad Compound Code | Composite Z-Score | Rescue Ability (% Control) | Well Position | Broad Compound Code | Composite Z-Score | Rescue Ability (% Control) |
|---------------|---------------------|-------------------|----------------------------|---------------|---------------------|-------------------|----------------------------|
| 1462-B09      | CMLD1_000030        | 3.8183            | 98%                        | 1462-C09      | CMLD1_000051        | 3.5176            | 2%                         |
| 2103-D21      | PK04_103081         | 3.7388            | 89%                        | 2131-I03      | Ald1.1-H_000163     | 3.8406            | 2%                         |
| 2002-G12      | ChemDiv3_000496     | 3.5701            | 76%                        | 2133-I03      | Ald1.1-H_000755     | 3.7981            | 2%                         |
| 1463-N04      | ICCB6_000290        | 4.0076            | 64%                        | 2103-I20      | PK04_103178         | 3.6721            | 2%                         |
| 1462-A16      | CMLD1_000016        | 3.854             | 63%                        | 2103-B03      | PK04_103025         | 3.762             | 1%                         |
| 2134-G21      | Ald1.1-H_001046     | 3.7592            | 51%                        | 1462-C07      | CMLD1_000049        | 3.5682            | 0%                         |
| 2055-H19      | Maybridge4_002285   | 3.4537            | 49%                        | 2103-E12      | PK04_103092         | 3.5425            | -1%                        |
| 1463-N16      | ICCB6_000302        | 3.5663            | 44%                        | 2103-B11      | PK04_103033         | 3.6273            | -1%                        |
| 1462-F19      | CMLD1_000124        | 4.157             | 42%                        | 2103-O02      | PK04_103278         | 3.6505            | -2%                        |
| 2134-I03      | CMLD1_000162        | 3.6503            | 41%                        | 2103-G02      | PK04_103122         | 3.8263            | -5%                        |
| 2002-H20      | ChemDiv 1602-1352   | 3.4075            | 41%                        | 2103-C02      | PK04_103046         | 3.7421            | -5%                        |
| 1462-H07      | CMLD1_000154        | 3.5369            | 39%                        | 2134-I07      | Ald1.1-H_001074     | 3.8105            | -7%                        |
| 1462-H17      | CMLD1_000164        | 3.5353            | 37%                        | 1462-B17      | CMLD1_000038        | 3.5736            | -7%                        |
| 2131-I07      | Ald1.1-H_000165     | 3.987             | 36%                        | 2078-A11      | TimTec1_005291      | 3.6328            | -8%                        |
| 2055-D04      | Maybridge4_002182   | 3.555             | 32%                        | 2001-C20      | ChemDiv 0242-417    | 3.4988            | -8%                        |
| 1462-H15      | Ald1.1-H_001072     | 3.6503            | 27%                        | 2131-N18      | Ald1.1-H_000264     | 3.716             | -9%                        |
| 1462-F17      | CMLD1_000122        | 3.8233            | 23%                        | 1462-B11      | CMLD1_000032        | 3.5739            | -10%                       |
| 2103-E22      | PK04_103100         | 3.6991            | 23%                        | 2103-G16      | PK04_103134         | 3.7816            | -10%                       |
| 2103-G14      | PK04_103132         | 3.8232            | 23%                        | 2133-I07      | Ald1.1-H_000757     | 3.9051            | -11%                       |
| 2055-D16      | Maybridge4_002194   | 3.433             | 23%                        | 2096-H02      | PK04_096142         | 3.8707            | -12%                       |
| 1462-G17      | CMLD1_000143        | 3.513             | 23%                        | 2103-H07      | PK04_103145         | 3.6441            | -14%                       |
| 2103-G08      | PK04_103126         | 3.5374            | 21%                        | 2054-N14      | Maybridge4_002060   | 3.6359            | -15%                       |
| 2103-C04      | PK04_103048         | 3.7856            | 18%                        | 2001-L09      | ChemDiv 0367-0918   | 3.4127            | -17%                       |
| 1462-E07      | CMLD1_000091        | 3.7092            | 17%                        | 1462-N07      | CMLD1_000279        | 3.5565            | -18%                       |
| 2103-I24      | PK04_103180         | 3.6673            | 16%                        | 2057-C18      | Maybridge4_002878   | 4.065             | -24%                       |
| 2103-B17      | PK04_103037         | 3.5871            | 15%                        | 2096-D20      | PK04_096080         | 3.6993            | -27%                       |
| 2103-E20      | PK04_103098         | 3.652             | 15%                        | 1462-C11      | CMLD1_000053        | 3.5302            | -28%                       |
| 2103-O04      | PK04_103280         | 3.7164            | 13%                        | 2133-C23      | Ald1.1-H_000655     | 3.5075            | -30%                       |
| 2108-B02      | PK04_108024         | 3.7944            | 13%                        | 2103-B21      | PK04_103041         | 3.6683            | -34%                       |
| 1462-G19      | CMLD1_000145        | 3.8152            | 12%                        | 2103-B07      | PK04_103029         | 3.8604            | -35%                       |
| 1462-C19      | CMLD1_000061        | 3.9804            | 12%                        | 1462-A19      | CMLD1_000019        | 3.9053            | -37%                       |
| 2103-E16      | PK04_103096         | 3.5508            | 10%                        | 2001-H11      | ChemDiv 0375-568    | 3.4411            | -41%                       |
| 2131-I17      | Ald1.1-H_000175     | 3.5173            | 8%                         | 1462-I17      | CMLD1_000185        | 3.7601            | -42%                       |
| 1462-A18      | CMLD1_000018        | 3.729             | 8%                         | 2131-M05      | Ald1.1-H_000235     | 3.5896            | -51%                       |
| 2103-B09      | PK04_103031         | 3.5123            | 6%                         | 2131-O15      | Ald1.1-H_000283     | 3.5713            | -53%                       |
| 2103-B05      | PK04_103027         | 3.7711            | 5%                         | 1462-M15      | CMLD1_000267        | 4.0814            | -57%                       |
| 2111-E22      | CMLD2_000723        | 3.5777            | 5%                         | 2109-I14      | CMLD2_000168        | 3.5309            | -73%                       |
| 2103-E14      | PK04_103094         | 3.8311            | 4%                         | 2103-D17      | PK04_103077         | 3.6186            | -197%                      |
| 2021-G12      | ChemDiv 7418-0147   | 3.4279            | 3%                         | 2103-D01      | PK04_103065         | 3.5336            | -204%                      |
| 2131-C23      | Ald1.1-H_000063     | 3.7647            | 3%                         |               |                     |                   |                            |

**Table S2.** Analogs of Compound 2002-H20

| ChemDiv Catalog Number | R1              | R2                               | R3              | R4 | R5 | R6                                 |
|------------------------|-----------------|----------------------------------|-----------------|----|----|------------------------------------|
| 1602-1352 (2002-H20)   | H               | H                                | H               | H  | H  | NH <sub>2</sub>                    |
| 1346-1290              | H               | H                                | H               | H  | H  | C(=O)-O-CH <sub>3</sub>            |
| 2026-3240              | H               | H                                | H               | H  | H  | F                                  |
| 2026-3246              | H               | H                                | H               | H  | H  | Br                                 |
| 2026-3255              | H               | H                                | H               | H  | H  | O-CH <sub>3</sub>                  |
| 2026-3258              | H               | H                                | H               | H  | H  | NO <sub>2</sub>                    |
| 2026-3262              | H               | H                                | H               | H  | H  | C(CH <sub>3</sub> )                |
| 2026-3267              | H               | H                                | H               | Cl | H  | Cl                                 |
| 2026-3269              | H               | H                                | H               | H  | Cl | Cl                                 |
| 2026-3380              | H               | CH <sub>3</sub>                  | H               | H  | H  | F                                  |
| 2026-3383              | H               | CH <sub>3</sub>                  | H               | H  | H  | Cl                                 |
| 2026-3392              | H               | CH <sub>3</sub>                  | H               | H  | H  | CH <sub>3</sub>                    |
| 2026-3395              | H               | CH <sub>3</sub>                  | H               | H  | H  | O-CH <sub>3</sub>                  |
| 2026-3407              | H               | CH <sub>3</sub>                  | H               | Cl | H  | Cl                                 |
| 2026-3431              | H               | CH <sub>2</sub> -CH <sub>3</sub> | H               | H  | H  | O-CH <sub>2</sub> -CH <sub>3</sub> |
| 2026-3981              | CH <sub>3</sub> | CH <sub>3</sub>                  | H               | H  | H  | F                                  |
| 2026-3984              | CH <sub>3</sub> | CH <sub>3</sub>                  | H               | H  | H  | Cl                                 |
| 2026-3989              | CH <sub>3</sub> | CH <sub>3</sub>                  | H               | H  | H  | I                                  |
| 2026-4002              | CH <sub>3</sub> | CH <sub>3</sub>                  | H               | H  | H  | O-CH <sub>3</sub>                  |
| 7761-0151              | H               | H                                | H               | H  | H  | Cl                                 |
| 8503-0073              | H               | H                                | CH <sub>3</sub> | H  | H  | O-CH <sub>3</sub>                  |
| 8503-0076              | H               | H                                | CH <sub>3</sub> | H  | H  | F                                  |

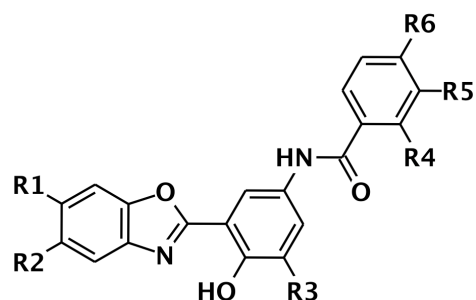

**Figure S1.** Analogs described in Table S2 were incubated at 100  $\mu$ M with 20  $\mu$ M A $\beta$ 42 peptide in PC12 cells. After 24 hours, the MTT assay was used to determine the ability of the compounds to rescue cells from A $\beta$ -induced toxicity. Measured viability of cells not exposed to A $\beta$  or compound was taken as 100 % rescue ( $A_{570-670} = 0.836$ ) and viability of cells exposed to A $\beta$  without compound as 0% rescue ( $A_{570-670} = 0.390$ ).

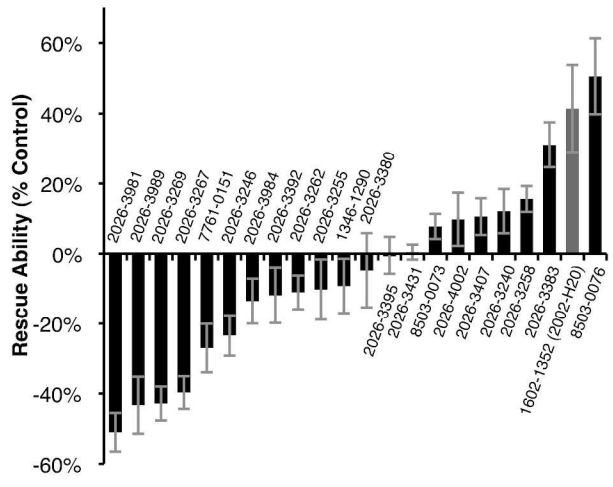

Supplement: NIHMS251694-supplement-1_si_001.pdf [file NIHMS251694-supplement-1_si_001.pdf]
